# Supplementary material for: A novel 2D metal–organic framework probe: a highly sensitive and visual fluorescent sensor for Al3+, Cr3+ and Fe3+ ions
Source: Royal Society of Chemistry journal article supplement (doi:10.1039/d2nj03911g), 2022-01-01
Supplement: d2nj03911g1.pdf [file d2nj03911g1.pdf]

## Electronic Supplementary Information

### **A Novel 2D Metal-Organic Framework Probe: Highly Sensitive and Visual Fluorescent Sensor for Al<sup>3+</sup>, Cr<sup>3+</sup>, Fe<sup>3+</sup> Ions**

*Min Shi, Chenchen Fu, Jie Yu, Yapu Yang and Pengfei Shi\**

Shandong Provincial Key Laboratory of Detection Technology for Tumor Markers,  
School of Chemistry and Chemical Engineering, Linyi University, Linyi 276000,  
Shandong, P. R. China.

**Table S1.** X-ray crystallographic data for **Tb-DBA**

|                                                                            |                                                                    |
|----------------------------------------------------------------------------|--------------------------------------------------------------------|
| Formula                                                                    | C <sub>33</sub> H <sub>21</sub> N <sub>2.5</sub> O <sub>8</sub> Tb |
| Fw                                                                         | 1507.11                                                            |
| Crystal system                                                             | Triclinic                                                          |
| Space group                                                                | <i>p</i> -1                                                        |
| <i>a</i> (Å)                                                               | 8.3473 (3)                                                         |
| <i>b</i> (Å)                                                               | 17.4598 (7)                                                        |
| <i>c</i> (Å)                                                               | 18.3029 (7)                                                        |
| $\alpha$ (°)                                                               | 76.871(2)                                                          |
| $\beta$ (°)                                                                | 89.666 (2)                                                         |
| $\gamma$ (°)                                                               | 81.002(2)                                                          |
| <i>V</i> (Å <sup>3</sup> )                                                 | 2564.59(17)                                                        |
| <i>Z</i>                                                                   | 1                                                                  |
| <i>D</i> <sub>c</sub> (g/cm <sup>3</sup> )                                 | 0.976                                                              |
| <i>F</i> (000)                                                             | 731.0                                                              |
| Reflns collected                                                           | 10503                                                              |
| Completeness(%)                                                            | 99.5                                                               |
| GOF on <i>F</i> <sup>2</sup>                                               | 1.040                                                              |
| <i>R</i> <sub>1</sub> / <i>wR</i> <sub>2</sub> [ <i>I</i> >2σ( <i>I</i> )] | 0.0405/0.1169                                                      |

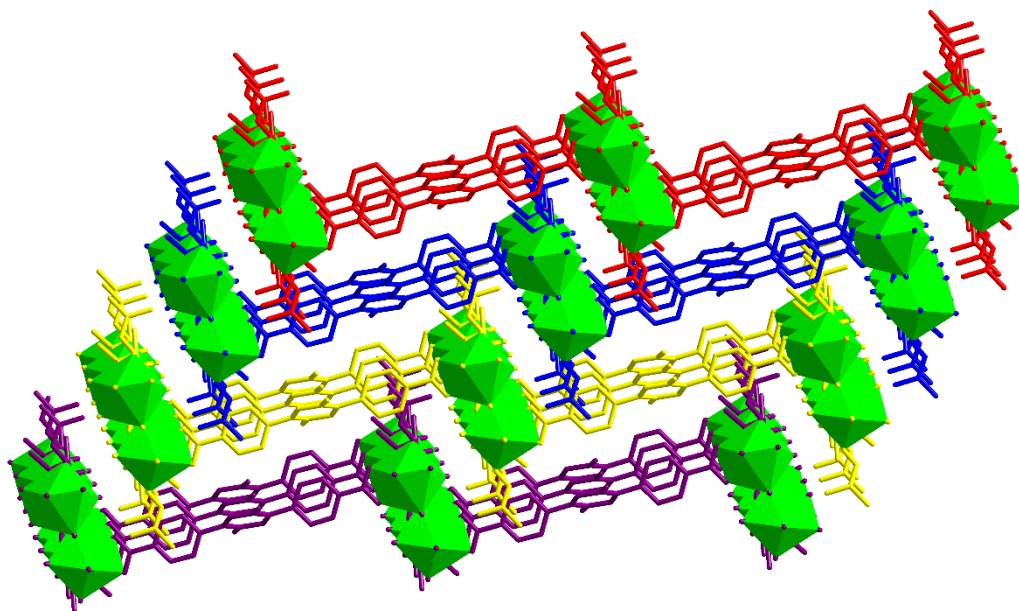**Fig. S1** The stacking structure of Tb-DBA.

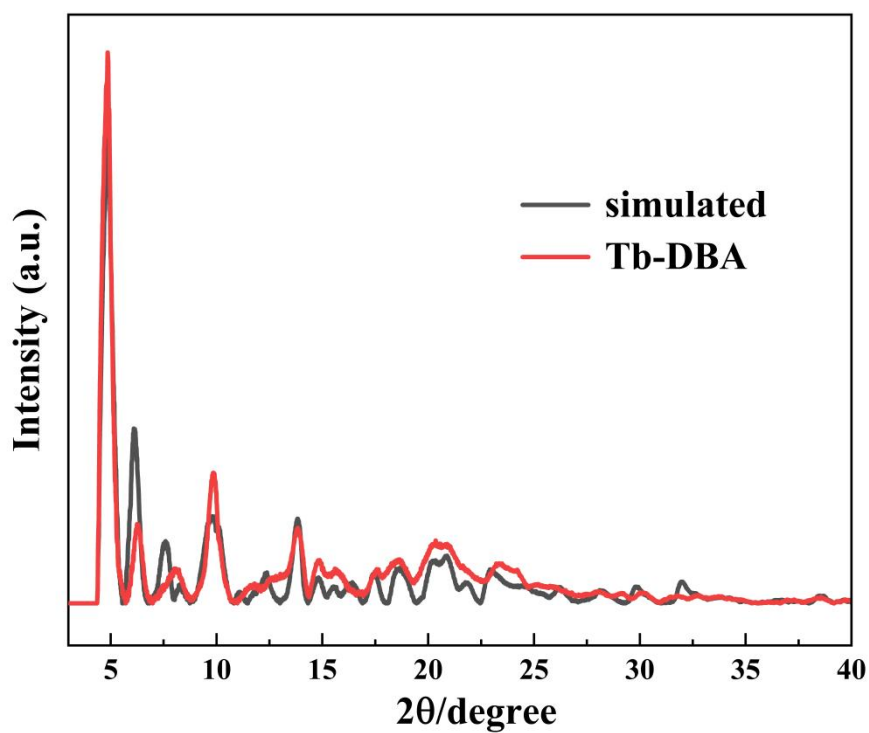

Fig. S2 As-synthesized and simulated PXRD patterns of Tb-DBA.

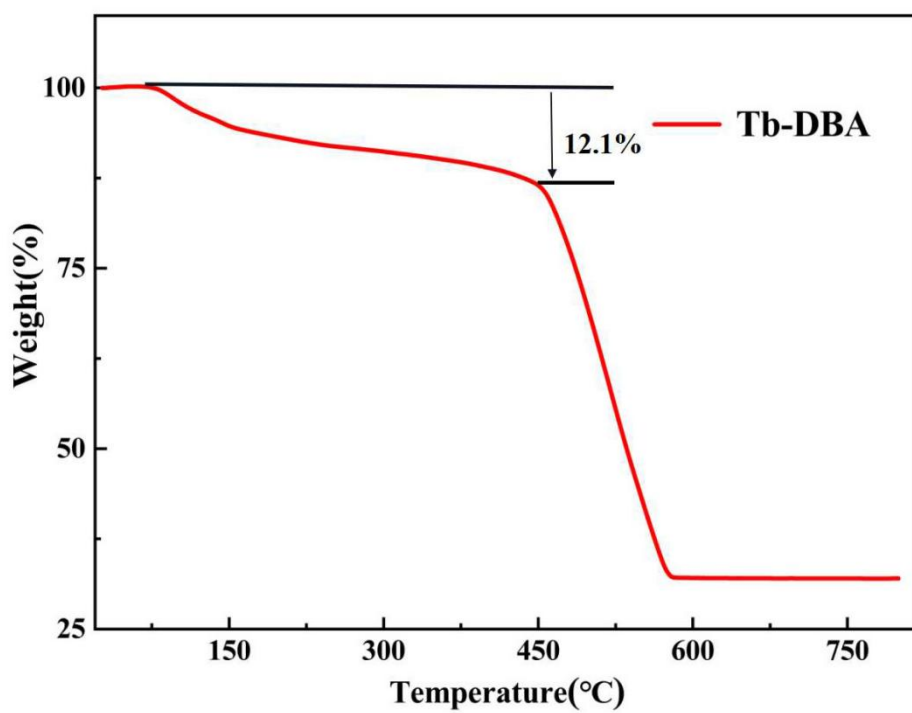

Fig. S3 TGA curves of Tb-DBA measured in  $N_2$  atmosphere at a temperature ramp of  $10^\circ C \text{ min}^{-1}$ .

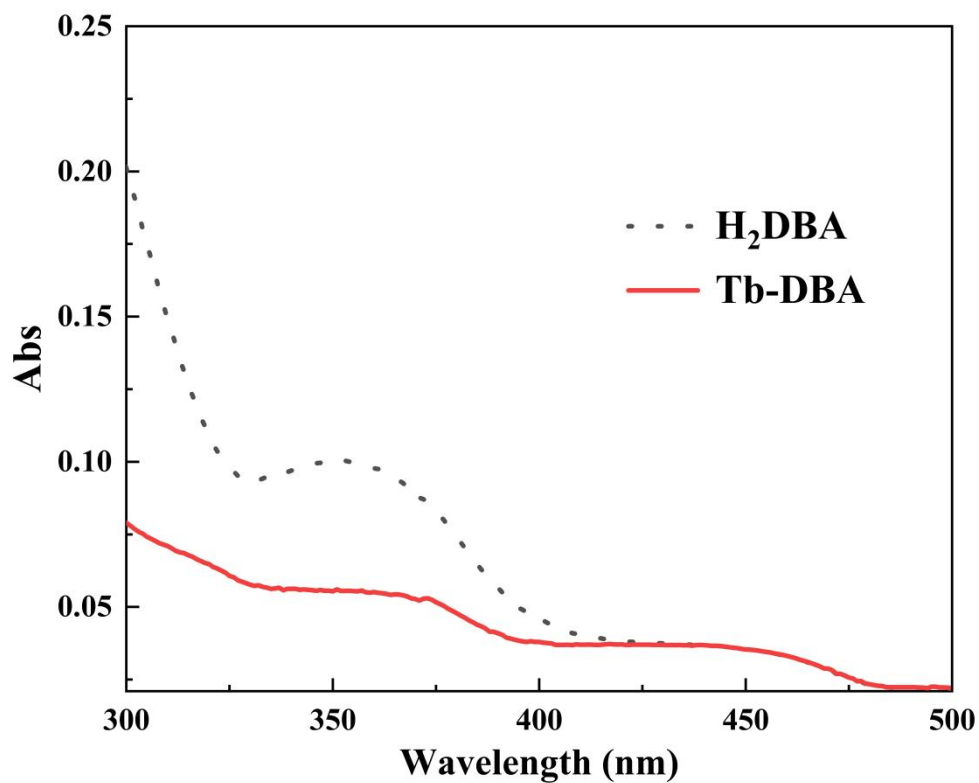

Fig. S4 UV-Vis spectra of H<sub>2</sub>DBA and Tb-DBA.

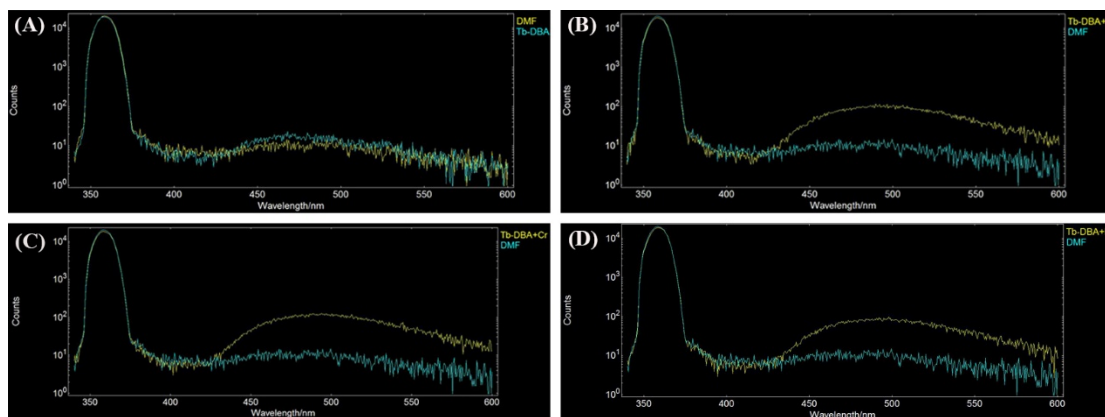

Figure S5. The quantum yields of Tb-DBA(A), Tb-DBA + Al<sup>3+</sup>(B), Tb-DBA + Cr<sup>3+</sup>(C) and Tb-DBA + Fe<sup>3+</sup>(D) .

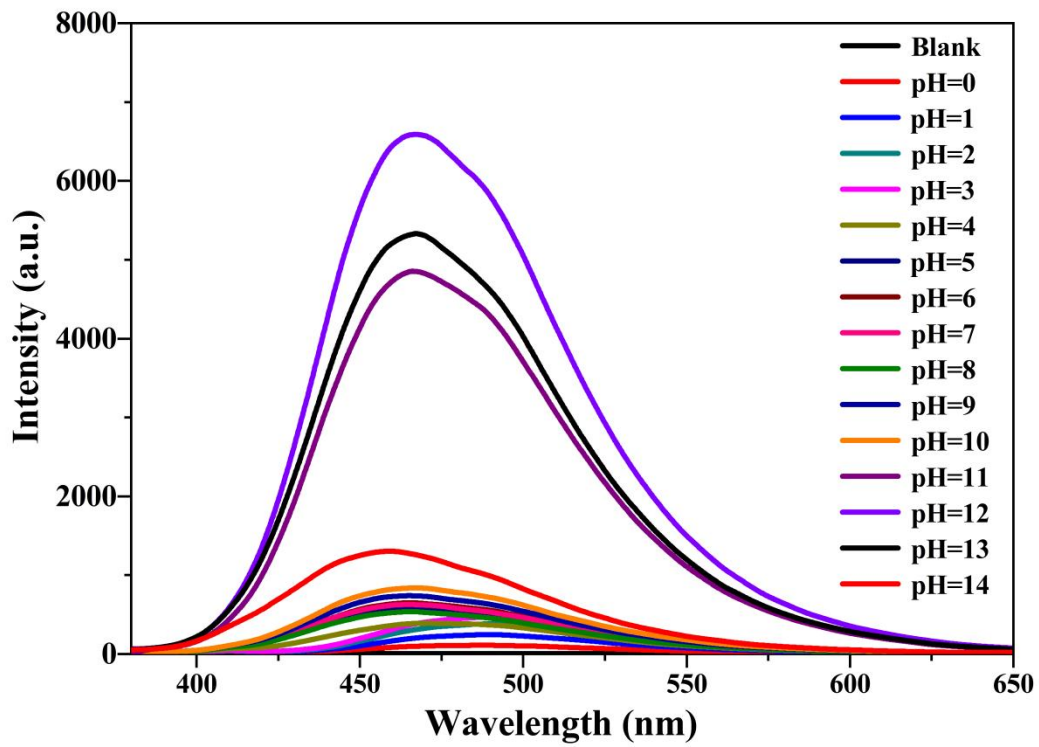

Fig. S6 Fluorescence of Tb-DBA in pH = 0-14 solutions.

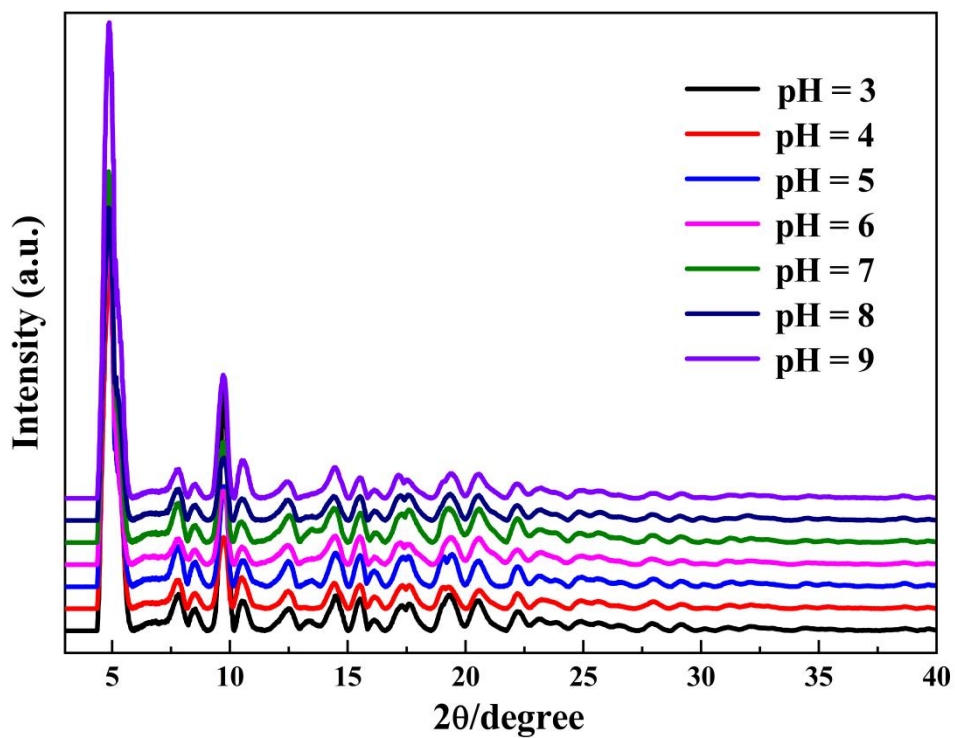

Fig. S7 PXRD patterns of Tb-DBA after soaked in different pH solutions.

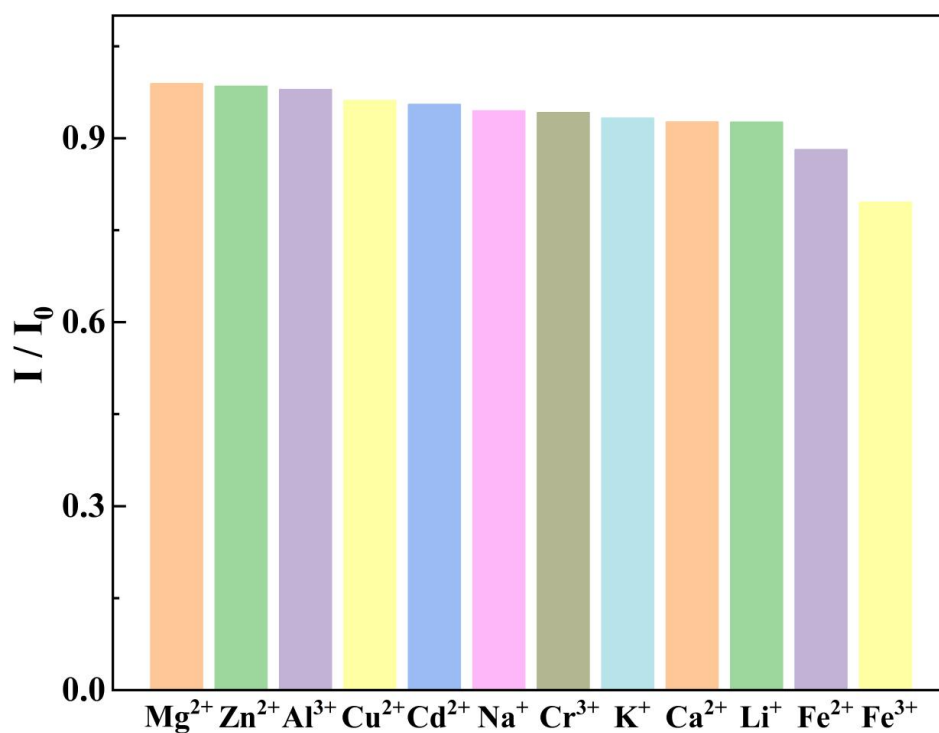

**Fig. S8** Relative luminescent intensity of H<sub>2</sub>DBA introduced into different cations at 485 nm.

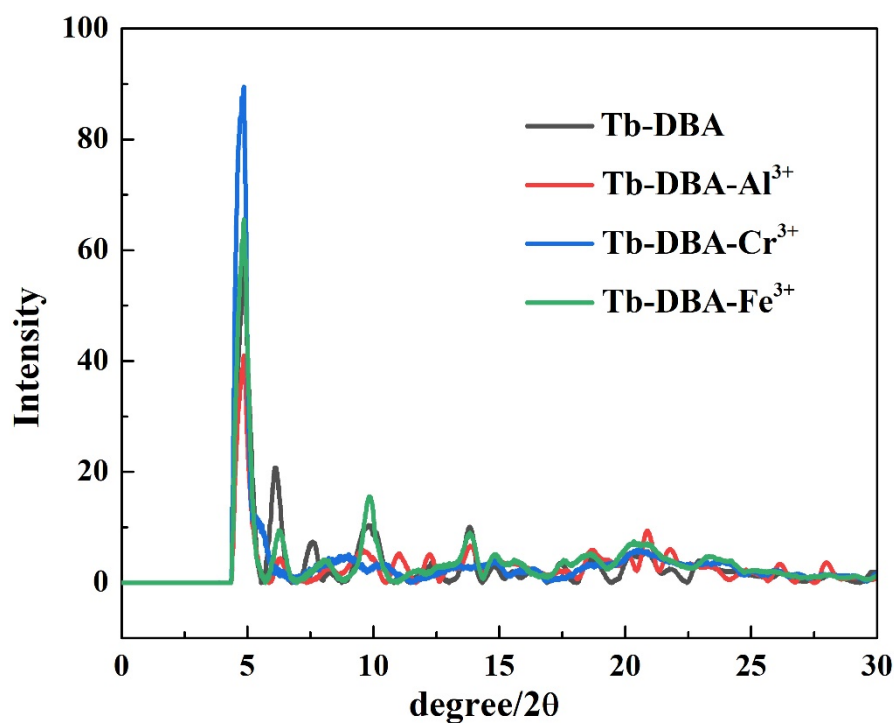

**Fig. S9** The PXRD patterns of Tb-DBA, Tb-DBA-Al<sup>3+</sup>, Tb-DBA-Cr<sup>3+</sup>, and Tb-DBA-Fe<sup>3+</sup>.

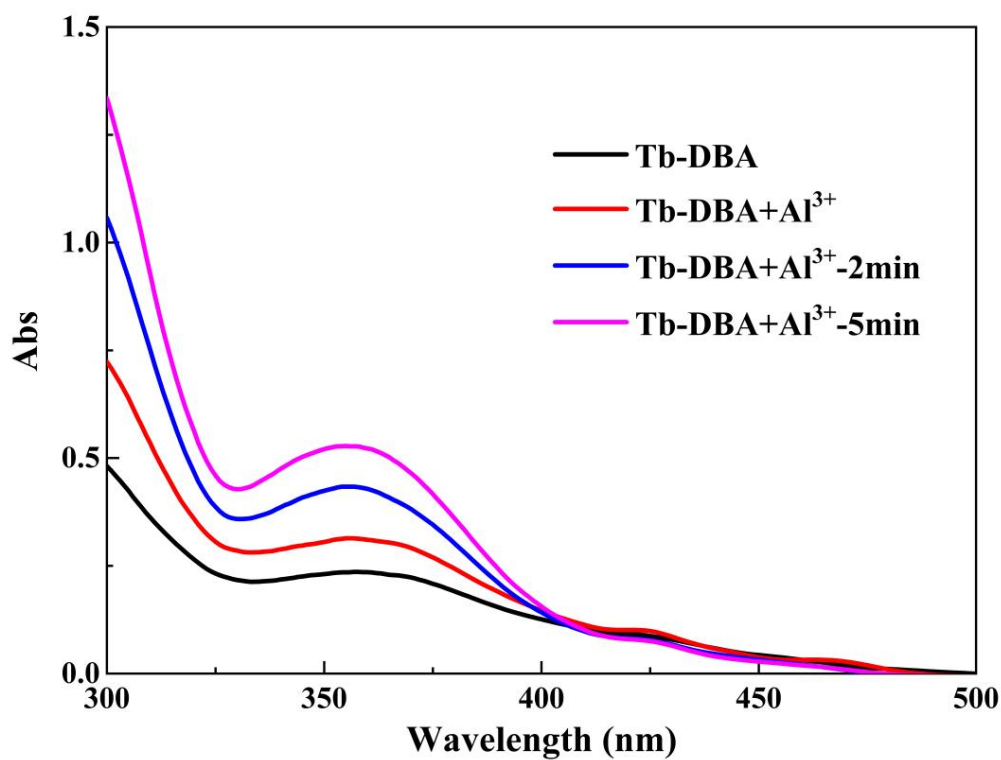

Fig. S10 UV-Vis spectra of Tb-DBA with Al<sup>3+</sup> ions.

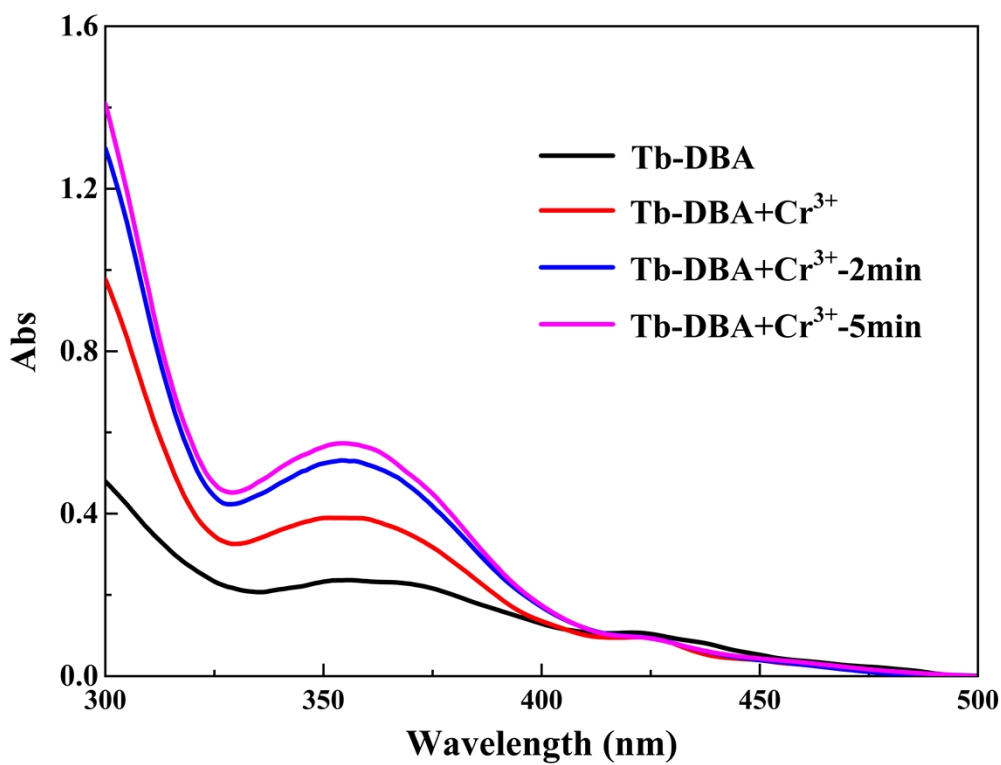

Fig. S11 UV-Vis spectra of Tb-DBA with Cr<sup>3+</sup> ions.

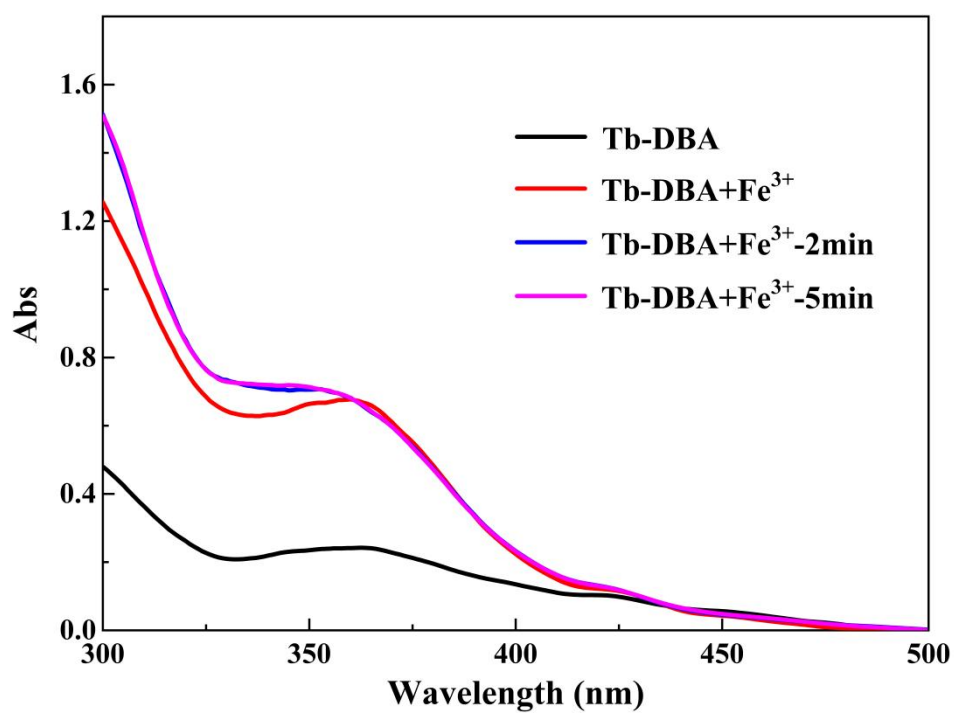

**Fig. S12** UV-Vis spectra of Tb-DBA with  $\text{Fe}^{3+}$  ions.

**Table S2.** ICP analysis for  $\text{Tb}^{3+}$  contents.

| Samples                  | $\text{Tb}^{3+}$ (mmol/L) |
|--------------------------|---------------------------|
| Tb-DBA                   | 0.00                      |
| Tb-DBA+ $\text{Al}^{3+}$ | 2.0                       |
| Tb-DBA+ $\text{Cr}^{3+}$ | 1.7                       |
| Tb-DBA+ $\text{Fe}^{3+}$ | 1.2                       |



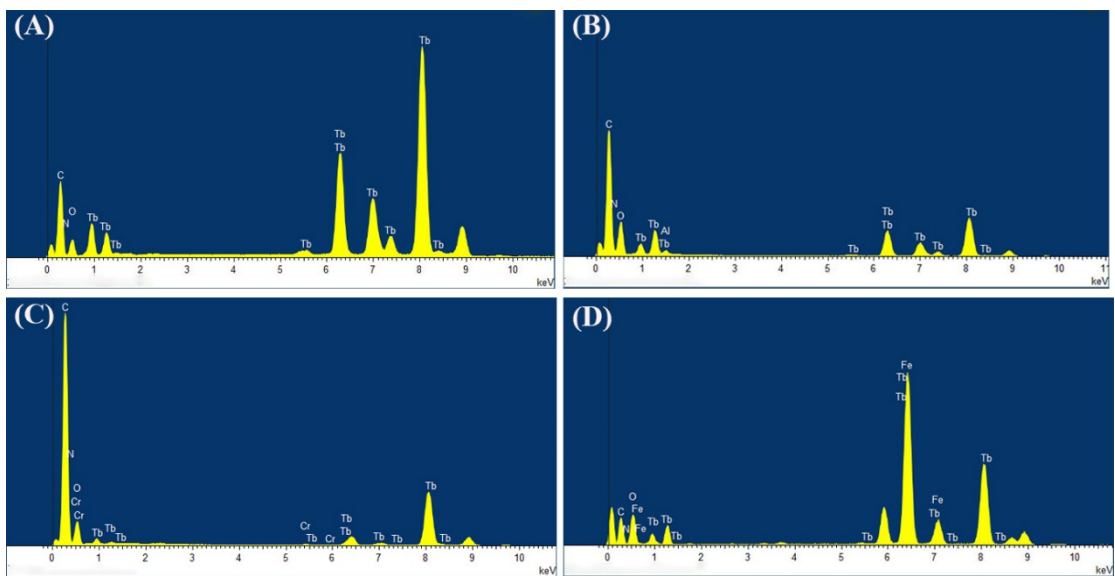

**Figure S13.** EDS measurement of Tb-DBA(A), Tb-DBA + Al<sup>3+</sup>(B), Tb-DBA + Cr<sup>3+</sup>(C) and Tb-DBA+Fe<sup>3+</sup>(D).
